# Supplementary material for: Exogenous glutathione maintains the postharvest quality of mango fruit by modulating the ascorbate-glutathione cycle
Source: PeerJ. 2023 Aug 22;11:e15902. doi: 10.7717/peerj.15902 (PMC10452625; doi:10.7717/peerj.15902)
Supplement: Supplemental Information 2 [file peerj-11-15902-s002.xlsx]

## Sheet: Weight loss
Days	Treatment	Fruit 1	Fruit 2	Fruit 3	Fruit 4	Fruit 5	Fruit 6	Fruit 7	Fruit 8
0d	Control	178.78	231.79	243.47	256.4	187.99	212.25	212.17	182.37
	2 mM GSH	202.54	222.09	221.42	182.01	211.95	240.58	193.81	207.54
	5 mM GSH	206.14	191.52	211.82	218.33	202.5	181.59	203.1	240.21
	8 mM GSH	230.89	179.88	207.45	200.21	199.89	206.28	214.43	211.28
Days	Treatment	Fruit 1	Fruit 2	Fruit 3	Fruit 4	Fruit 5	Fruit 6	Fruit 7	Fruit 8
4d	Control	167.95	221.27	231.41	241.7	175.66	202.93	200.6	170.6
	2 mM GSH	192.08	210.36	207.28	170.91	202.47	227.78	183.02	193.65
	5 mM GSH	192.64	178.53	198.27	205.94	193.7	169.8	189.36	228.18
	8 mM GSH	216.34	168.23	195.1	189.98	189.87	194.15	201.98	196.51
Days	Treatment	Fruit 1	Fruit 2	Fruit 3	Fruit 4	Fruit 5	Fruit 6	Fruit 7	Fruit 8
8d	Control	159.28	212.16	221.72	230.4	166.43	195.35	192.13	161.67
	2 mM GSH	183.73	201.2	194.87	162.45	194.87	216.9	174.38	183
	5 mM GSH	181.3	167.45	188.27	195.56	186.06	160.27	178.55	218.87
	8 mM GSH	205.3	159.6	185.34	181.78	180.72	183.88	191.97	185.16

## Sheet: Firmness
Days	Treatment	No.	1	2	3
0d	Control	Fruit 1	314	363.5	367.1
		Fruit 2	426.9	396.6	406
		Fruit 3	364.6	389.7	410
		Fruit 4	384.5	441.2	473.9
		Fruit 5	364.2	405	412.7
		Fruit 6	332.6	330.2	341.4
Days	Treatment	No.	1	2	3
4d	Control	Fruit 1	165.9	267.4	276.8
		Fruit 2	409.1	364.1	435.1
		Fruit 3	193.9	263.5	211.6
		Fruit 4	351.4	398.5	447.8
		Fruit 5	450.7	528.7	519.1
		Fruit 6	524.9	561.8	505.8
	2 mM GSH	Fruit 1	272.9	374.1	330
		Fruit 2	236.2	161.6	242.2
		Fruit 3	184.8	192.5	189.6
		Fruit 4	210.6	184.4	201
		Fruit 5	221.6	289.4	205.5
		Fruit 6	587.9	688	596.1
	5 mM GSH	Fruit 1	288.4	332.6	416.5
		Fruit 2	244.7	241	198.3
		Fruit 3	337.6	347	363
		Fruit 4	191.4	183.5	227
		Fruit 5	92.8	82.9	141.1
		Fruit 6	451.4	467.8	445.4
	8 mM GSH	Fruit 1	270	245.5	251.2
		Fruit 2	241.9	218.9	199.8
		Fruit 3	164.6	147.4	166.3
		Fruit 4	155.2	119.7	207.2
		Fruit 5	220.8	250.9	238
		Fruit 6	219.3	174.7	159.9
Days	Treatment	编号	1	2	3
8d	Control	Fruit 1	13.49	17.21	21.25
		Fruit 2	18.44	22.06	12.45
		Fruit 3	11.65	9.37	10.89
		Fruit 4	6.64	7.73	10.01
		Fruit 5	16.07	15.93	14.46
		Fruit 6	7.69	7.51	7.9
	2 mM GSH	Fruit 1	11.77	14.18	15.27
		Fruit 2	9.22	9.5	10.09
		Fruit 3	10.43	11.56	10.09
		Fruit 4	8.78	12.74	13.18
		Fruit 5	19.22	21.75	24.3
		Fruit 6	16.36	14.59	16.33
	5 mM GSH	Fruit 1	13.32	12.59	14.18
		Fruit 2	15.25	14.58	13.4
		Fruit 3	10.88	13.07	12.47
		Fruit 4	20.97	21	14.81
		Fruit 5	11.37	14.24	15.35
		Fruit 6	12.8	14.8	14.12
	8 mM GSH	Fruit 1	13.73	14.41	12.48
		Fruit 2	19.85	19	15.9
		Fruit 3	12.71	13.07	11.77
		Fruit 4	16.1	15	12.9
		Fruit 5	16.55	18.65	14.6
		Fruit 6	13.12	12.29	12.05

## Sheet: Color
0d	Control		Fruit 1		Fruit 2		Fruit 3		Fruit 4		Fruit 5		Fruit 6
		L*	49.26	43.45	42.41	44.19	44.39	49.97	45.8	48.83	55.54	50.37	49.31	53.21
		c*	37.39	28.9	32.97	23.52	25	29.88	26.93	27.11	34.66	27.01	30.78	32.98
		h	117.38	122.03	119.32	123.26	122.89	119.58	119.81	120.68	113.23	122.38	118.98	118.95
		a*	-17.2	-15.33	-16.15	-12.9	-13.58	-14.75	-13.39	-13.84	-13.67	-14.46	-14.91	-15.96
		b*	33.2	24.5	28.75	19.67	20.99	25.98	23.36	23.32	31.85	22.81	26.93	28.86
4d	Control		Fruit 1	Fruit 2	Fruit 3	Fruit 4	Fruit 5	Fruit 6
		L*	48.07	50.42	46.41	50.93	46.49	52.62
		c*	32.89	36.49	26.8	34.66	33.86	38.17
		h	118.19	115.91	119.77	116.89	119.87	116.13
		a*	-15.54	-15.94	-13.31	-15.68	-16.86	-16.81
		b*	28.99	32.82	23.26	30.91	29.37	34.27
	2 mM GSH		Fruit 1	Fruit 2	Fruit 3	Fruit 4	Fruit 5	Fruit 6
		L*	51.69	45.78	47.28	50.01	49.01	48.61
		c*	37.36	31.49	33.89	28.4	26.44	28.11
		h	117.39	114.46	116.13	117.38	119.94	121.1
		a*	-17.19	-13.04	-14.92	-13.06	-13.2	-14.52
		b*	33.18	28.66	30.43	25.22	22.91	24.07
	5 mM GSH		Fruit 1	Fruit 2	Fruit 3	Fruit 4	Fruit 5	Fruit 6
		L*	45.89	52.85	54.06	49.83	47.5	48.27
		c*	33.32	35.25	40.35	30.91	32.12	30.39
		h	115.9	114.55	113.95	114.55	115.11	118.1
		a*	-14.55	-14.65	-16.38	-12.84	-13.63	-14.31
		b*	29.97	32.07	36.88	28.12	29.09	26.08
	8 mM GSH		Fruit 1	Fruit 2	Fruit 3	Fruit 4	Fruit 5	Fruit 6
		L*	50.72	52.47	47.7	48.89	49.52	54.25
		c*	35.27	37.8	31.71	33.88	36.43	39.49
		h	115.64	116.22	117.25	117.81	113.93	112.96
		a*	-15.26	-16.7	-14.52	-15.81	-14.78	-15.4
		b*	31.8	33.91	28.19	29.97	33.3	36.36
8d	Control		Fruit 1	Fruit 2	Fruit 3	Fruit 4	Fruit 5	Fruit 6
		L*	47.46	44.94	54.58	47.48	47.08	48.49
		c*	33.17	33.62	40.34	37.68	35.55	36.35
		h	115.28	114.28	111.9	114.23	114.72	114.08
		a*	-14.17	-13.83	-15.05	-15.47	-14.87	-14.83
		b*	30	30.65	37.43	34.36	32.29	33.19
	2 mM GSH		Fruit 1	Fruit 2	Fruit 3	Fruit 4	Fruit 5	Fruit 6
		L*	46.78	49.59	45.9	51.61	53.89	50.9
		c*	30.41	34.17	29.7	38.19	40.61	35.43
		h	115.81	115.19	115.34	111.75	115.1	113.38
		a*	-13.24	-14.54	-12.71	-14.15	-17.22	-14.06
		b*	27.37	30.92	26.84	35.47	36.77	32.52
	5 mM GSH		Fruit 1	Fruit 2	Fruit 3	Fruit 4	Fruit 5	Fruit 6
		L*	46.23	45.84	44.9	48.45	43.94	46.53
		c*	26.46	29.97	24.97	33.41	26.45	33.18
		h	118.18	115.83	116.35	115.88	119.89	114.57
		a*	-12.5	-13.06	-11.08	-14.58	-13.18	-13.8
		b*	23.33	26.98	22.38	30.06	22.93	30.18
	8 mM GSH		Fruit 1	Fruit 2	Fruit 3	Fruit 4	Fruit 5	Fruit 6
		L*	46.59	47.47	49.93	45.68	44.22	49.61
		c*	28.2	30.94	34.77	32.45	32.24	33.84
		h	119.27	113.69	112.2	116.81	118.45	113.39
		a*	-13.79	-12.43	-13.14	-14.63	-15.36	-13.44
		b*	24.6	28.33	32.19	28.96	28.35	31.06

## Sheet: PH
Days	Treatment	1	2	3	4
0d	Control	4.03	4.02	3.98	3.98
4d	Control	3.96	3.99	3.97	3.99
	2 mM GSH	4.14	4.14	4.17	4.16
	5 mM GSH	4.03	4.08	4.03	4.1
	8 mM GSH	4.15	4.17	4.13	4.16
Days	Treatment	1	2	3	4
8d	Control	4.39	4.35	4.36	4.35
	2 mM GSH	4.17	4.15	4.17	4.2
	5 mM GSH	4.15	4.1	4.15	4.15
	8 mM GSH	4.08	4	3.98	4.01

## Sheet: Soluble solids
Days	Treatment	1	2	3	4
0d	Control	2.7	2.7	2.7	2.7
Days	Treatment	1	2	3	4
4d	Control	5.4	5.2	5.2	5.1
	2 mM GSH	6.9	6.8	6.9	6.9
	5 mM GSH	5.9	5.8	5.9	5.9
	8 mM GSH	6.7	6.7	6.7	6.7
Days	Treatment	1	2	3	4
8d	Control	8.6	8.8	8.8	8.8
	2 mM GSH	8.4	8.4	8.4	8.4
	5 mM GSH	8.4	8.4	8.4	8.4
	8 mM GSH	8.5	8.5	8.5	8.5

## Sheet: TA
TA
Days	Treatment	1	2	3	4
0d	Control	8.3	8.5	8.3	8.5
4d	Control	7.2	7.1	7.2	7.1
	2 mM GSH	6.1	6	6.1	6
	5 mM GSH	6.8	7.4	6.8	7.4
	8 mM GSH	7.2	7.7	7.2	7.7
8d	Control	2	2.2	2	2.2
	2 mM GSH	4.3	4.2	4.3	4.2
	5 mM GSH	3	2.7	3	2.7
	8 mM GSH	3	4.5	3	4.5

## Sheet: Soluble suger
Soluble suger		A1					A0
Days	Treatment	1	2	3	4	5
0d	Control	0.007	0.008	0.009	0.039	0.005	0.023
4d	Control	0.042	0.038	0.05	0.059	0.056
	2 mM GSH	0.06	0.032	0.043	0.044	0.042
	5 mM GSH	0.042	0.037	0.042	0.044	0.045
	8 mM GSH	0.035	0.03	0.041	0.043	0.04
8d	Control	0.064	0.072	0.073	0.079	0.07
	2 mM GSH	0.054	0.073	0.06	0.074	0.035
	5 mM GSH	0.044	0.048	0.059	0.049	0.044
	8 mM GSH	0.044	0.044	0.049	0.045	0.046

## Sheet: MDA
MDA		A600					A532
Days	Treatment	1	2	3	4	5	1	2	3	4	5
0d	Control	0.207	-	0.265	0.006	0.009	0.224	-	0.294	0.028	0.032
4d	Control	0.013	0.016	0.004	0.006	0.014	0.05	0.051	0.036	0.03	0.04
	2 mM GSH	0.014	0.003	0.017	0.015	0.005	0.058	0.046	0.073	0.064	0.053
	5 mM GSH	0.007	0.014	0.009	0.002	0.015	0.039	0.051	0.046	0.037	0.05
	8 mM GSH	0.008	0.013	0.002	0.007	0.015	0.058	0.053	0.043	0.049	0.051
8d	Control	0.006	0.01	0.015	0.005	0.009	0.08	0.089	0.08	0.082	0.086
	2 mM GSH	0.003	0.014	0.011	0.007	0.02	0.048	0.057	0.093	0.053	0.076
	5 mM GSH	0	0.007	0.014	0.008	0.015	0.053	0.059	0.071	0.081	0.064
	8 mM GSH	0.004	0.004	0.014	0.01	0.002	0.052	0.07	0.066	0.085	0.053

## Sheet: H2O2
H2O2		A1					A0
Days	Treatment	1	2	3	4	5
0d	Control	0.036	0.028	0.036	0.035	0.044	0
4d	Control	0.039	0.037	0.053	0.031	0.051
	2 mM GSH	0.046	0.036	0.052	0.113	0.069
	5 mM GSH	0.054	0.036	0.069	0.029	0.025
	8 mM GSH	0.046	0.038	0.041	0.056	0.064
8d	Control	0.049	0.045	0.055	0.048	0.058
	2 mM GSH	0.061	0.05	0.054	0.051	0.063
	5 mM GSH	0.057	0.053	0.041	0.047	0.035
	8 mM GSH	0.049	0.053	0.055	0.071	0.065

## Sheet: AsA
AsA		A1
Days	Treatment	1	2	3	4	5
	A0	0.292
0d	Control	0.45	0.454	0.454	0.432	0.449
4d	Control	0.468	0.482	0.524	0.503	0.502
	2 mM GSH	0.594	0.577	0.526	0.538	0.528
	5 mM GSH	0.62	0.597	0.618	0.541	0.64
	8 mM GSH	0.608	0.628	0.578	0.62	0.621
8d	Control	0.475	0.479	0.458	0.445	0.495
	2 mM GSH	0.415	0.597	0.429	0.488	0.466
	5 mM GSH	0.468	0.457	0.593	0.494	0.485
	8 mM GSH	0.585	0.612	0.593	0.579	0.612

[truncated: 11 more sheets: DHA, GSH, GSSG, SOD, POD, CAT, APX, MDHAR, DHAR, GR, Gene expression level]
